# Supplementary material for: Coding transcriptome analyses reveal altered functions underlying immunotolerance of PEG-fused rat sciatic nerve allografts
Source: Springer Nature journal article supplement (doi:10.1186/s12974-020-01953-8), 2020-10-02
Supplement: MOESM1 [file 18442410]

### PEG-fused sciatic allograft ("PEG" group)

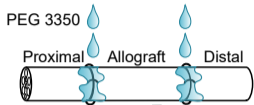

### Negative control sciatic allograft ("NC" group)

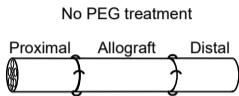

No PEG treatment

Total RNA

Library preparation  
(TruSeq Stranded mRNA kit)

**Sequence with Illumina HiSeq 3000**

- 20 million reads/sample  
- 75bp paired-end reads

Analysis

1. Quality control: **FastQC**
2. Mapping to rat genome Rnor\_6.0: **Tophat2**
3. Read counts: **HTSeq-count**
4. Differential expression: **DESeq2**
5. Gene ontology/pathway analysis: **BiNGO, DAVID**
6. Protein-protein interaction networks: **STRING + Cytoscape**

Validation of RNAseq results

RT-qPCR

Immunohistochemistry

RNA extraction  
(TRIzol + RNeasy Mini kit)

Unoperated nerve (n=2)

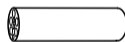

14d PO recovery

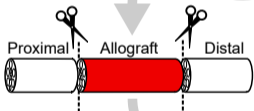

PEG (n=3)

NC (n=3)
