# Supplementary material for: Coding transcriptome analyses reveal altered functions underlying immunotolerance of PEG-fused rat sciatic nerve allografts
Source: Springer Nature journal article supplement (doi:10.1186/s12974-020-01953-8), 2020-10-02

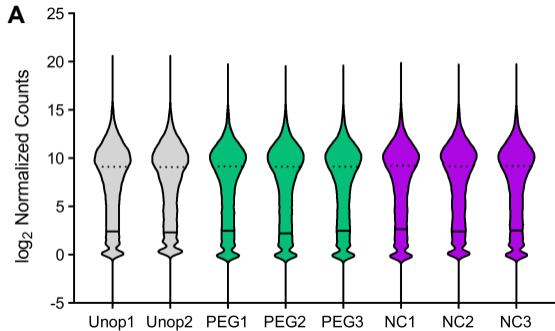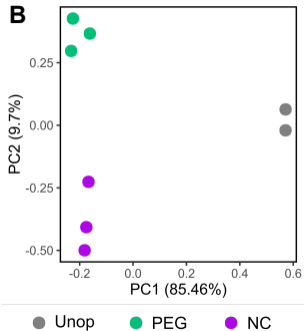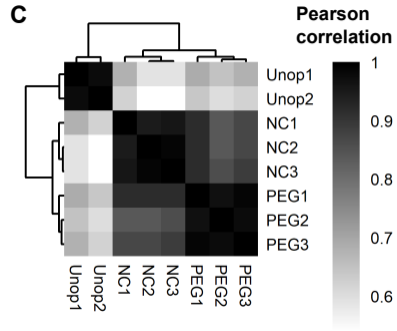

Supplement: MOESM3 [file 18442410]
